# Supplementary material for: Expression and replication of virus-like circular DNA in human cells
Source: PubMed Central journal article supplement (PMC5809378; doi:10.1038/s41598-018-21317-w), 2018-02-12

# 1 **Expression and replication of virus-like circular DNA in human cells**

2

3 Sebastian Eilebrecht, Agnes Hotz-Wagenblatt, Victor Sarachaga, Amelie Burk, Konstantina  
4 Falida, Deblina Chakraborty, Ekaterina Nikitina, Claudia Tessmer, Corinna Whitley,  
5 Charlotte Sauerland, Karin Gunst, Imke Grewe and Timo Bund

6

## 7 **Supplemental material**

8 *Reverse transcription (RT) PCR and long PCR.*

9 For cDNA synthesis 1µg of DNase1-treated total RNA was incubated with either 1µl random  
10 hexamer (20µM) or oligo-dT primers (12µM) at 72°C for 3 minutes, before the reaction was  
11 cooled to 42°C for 2 minutes. After adjustment to 1x First-Strand Buffer, 2.5mM DTT and  
12 1mM dNTPs, 20 U RNase Inhibitor (Clontech) and 100 U SMARTScribe Reverse  
13 Transcriptase (Clontech) were added and the reaction was incubated at 42°C for 90 minutes.  
14 Subsequently the reaction was terminated by incubation at 70°C for 10 minutes and the total  
15 volume was adjusted to 200µl with Tricine-EDTA buffer (Clontech). A reaction lacking  
16 reverse transcriptase served as a negative control (-RT). For the detection of cDNAs of  
17 polyadenylated transcripts of MSBI1.176, 2.5µl of an oligo-dT primed RT reaction were  
18 amplified by PCR using SeqAmp DNA Polymerase (Clontech) as recommended by the  
19 manufacturer in the presence of the primers MSBI1.176 F384: 5'-CTT TTA AAG TTT TTA  
20 AAT GCT TTT AAA TGC-3' and R1693 5'-CCC TGA TTA CAG TGT TTT TGC TTT TG-  
21 3', F647: 5'-TAT AAC TTA GCT TTG GTT GAA CAG A-3' and R1303: 5'-CGT TTT ATC  
22 GCT GTT TTG TTT CTT G-3' or F28: 5'-AGC GAC TCA ATG AAA GTT CGA TTA TTC  
23 CCC-3' and R1693. 1 ng of circular MSBI1.176 DNA was used as a template for a positive  
24 control reaction for each primer combination. The PCR program was as following: 30 cycles:  
25 94°C for 30 seconds, 60°C for 30 seconds, 72°C for 3 minutes. For the detection of cDNAs of

26 polyadenylated transcripts of CMI1.252, 2.5 µl of an oligo-dT primed RT reaction were  
27 amplified as mentioned above in the presence of the primers CMI1.252 F352: 5'-CTT TTA  
28 AAG TTT TTA AAT GCT TTT AAA TGC-3' and R2143: 5'-GGT TGT CCA CGA TAC  
29 TCA CTT TT-3', F1510: 5'-AAA ACA AGC TAG AAG AAT TTG GCG-3' and R2281: 5'-  
30 CTA CAT TGT TCA GGC TTT AGC TC-3' or F57: 5'-TAC ACG AGC AAA GCG AGT  
31 TCA TA-3' and R2143.

32 Long PCR for detection of full length MSBI1.176 or CMI1.252 DNA was performed using  
33 La Taq polymerase (Takara) as recommended by the manufacturer. 1 ng of DpnI-digested  
34 circular MSBI1.176 or CMI1.252 input DNA was used as a template for a negative control  
35 reaction and 1 ng of non-digested input DNA was used as a template for a positive control  
36 reaction. The corresponding primers were MSBI1.176 F1656: 5'-CCC CTC AAC CCC AAA  
37 AGC AA-3' and MSBI1.176 R1655: 5'-TTT ACC CCC ACG GAC TTC CA-3' and  
38 CMI1.252 F2250: 5'-CAA CAA TGA GCG AGC TAA AGC C-3' and R 2249: 5'-TAC  
39 GAA AGC TAG CAC CAC CG-3'. The long PCR program for MSBI1.176 detection was as  
40 following: 94°C for 1 minute, 5 cycles: 94°C for 30 seconds, 58°C for 1 minute, 72°C for 4  
41 minutes, 5 cycles: 94°C for 30 seconds, 56°C for 1 minute, 72°C for 4 minutes, 20 cycles:  
42 94°C for 30 seconds, 54°C for 1 minute, 72°C for 4 minutes seconds, 72°C for 10 minutes.  
43 For CMI1.252 detection the following PCR program was used: 94°C for 1 minute, 5 cycles:  
44 94°C for 30 seconds, 66°C for 1 minute, 72°C for 4 minutes, 5 cycles: 94°C for 30 seconds,  
45 64°C for 1 minute, 72°C for 4 minutes, 20 cycles: 94°C for 30 seconds, 62°C for 1 minute,  
46 72°C for 4 minutes seconds, 72°C for 10 minutes.

47

48 *Quantitative PCR (qPCR).*

49 Quantitative PCR (qPCR) analyses were performed using the SYBR Green PCR Master Mix  
50 (Applied Biosystems) and a Stratagene Mx3000P qPCR machine (Stratagene) as  
51 recommended by the manufacturer. For the quantification of RT-generated cDNA the  
52 following primers were used: CMI1.252 F1514 5'-ACA AGC TAG AAG AAT TTG GCG  
53 TG-3', CMI1.252 R1734 5'-TGG CAC AGT AGA GCT TTC ATC A-3', CMI3.168 F647 5'-  
54 AGG CGA GAG AAA CAG GCA AA-3', CMI3.168 R851 5'-TGC GAT ACC CAA CGA  
55 CTT GT-3', MSBI1.176 F433 5'-CCC ACA CAG CAA GGC ATA CA-3', MSBI1.176 R717  
56 5'-CCT TTG CCT GTT TCT CTC GC-3', MSBI2.176 F1216 5'-TCA CAG CCA CCT ACG  
57 AAC AG-3', MSBI2.176 R1381 5'-TTT GCG ATC TGA GGC TCT GT-3', beta actin F 5'-  
58 CCA CCA TGT ACC CTG GCA TT-3' and beta actin R 5'-ATC TGA GGA GGG AAG  
59 GGG AC-3'. For the genome-specific quantification of DpnI-resistant, replicated DNA the  
60 following primers were used: MSBI1.176 F235 5'-ACG GGT AGG CTT GCT TAT TTG A-  
61 3', MSBI1.176 R717 5'-CCT TTG CCT GTT TCT CTC GC-3', CMI1.252 F1514 5'-ACA  
62 AGC TAG AAG AAT TTG GCG TG-3' and CMI1.252 R1734 5'-TGG CAC AGT AGA  
63 GCT TTC ATC A-3'. Notably, the latter primer combinations cover at least two DpnI  
64 restriction sites in either genome and are isolate-specific. Absolute amounts of replicated  
65 CMI1.252 and MSBI1.176 DNA molecules were quantified using standard curves with  
66 defined amounts of the corresponding circular molecules.

67

68 *Rapid amplification of cDNA ends (RACE).*

69 To generate 5'- and 3'-RACE-ready cDNA, the SMARTer RACE 5'3' kit (Clontech) was used.  
70 For 5'-RACE-ready cDNA, 1µg of DNaseI-treated total RNA from transfected HEK293TT  
71 cells was incubated with 1µl of primer MSBI1.176 RT848 (5'-GGT AAC TGA ATT GAC  
72 GGG CA-3'), MSBI1.176 RT1296 (5'-TCG CTG TTT TGT TTC TTG TGC-3') or

73 MSBI1.176 RT1431 (5'-ATT TCC CCT GTA ACA CGG CT-3') (2.5 $\mu$ M) at 72°C for 3  
74 minutes, before the reaction was cooled to 42°C for 2 minutes. In the case of CMI1.252, the  
75 primers CMI1.252 RT1052 (5'-TTT TTC CTG TGC TAC GCC AA-3') or CMI1.252  
76 RT2095 (5'- ATG CTA CAA AAC CAA CGC CA-3') were used. After addition of 1 $\mu$ l of the  
77 SMARTer II A oligonucleotide (24 $\mu$ M), the reaction was adjusted to 1x first-strand buffer,  
78 2.5mM DTT and 1mM dNTPs, then 20 U RNase Inhibitor (Clontech) and 100 U  
79 SMARTScribe Reverse Transcriptase (Clontech) were added and the reaction was incubated  
80 at 42°C for 90 minutes. Subsequently the reaction was terminated by incubation at 70°C for  
81 10 minutes and the total volume was adjusted to 200 $\mu$ l with Tricine-EDTA buffer (Clontech).  
82 3'-RACE-ready cDNA was prepared from 1 $\mu$ g of DNase1-treated total RNA from transfected  
83 HEK293TT cells as recommended by the manufacturer. For RACE, 2.5 $\mu$ l of 5'- or 3'-RACE-  
84 ready cDNA was used as a template for a PCR reaction containing 1 $\mu$ l 5'- or 3'- gene specific  
85 primer (10 $\mu$ M), 1x universal primer mix (UPM) and 1 $\mu$ l SeqAmp DNA Polymerase in 1x  
86 SeqAmp buffer (Clontech). The PCR program was as following: 5 cycles: 94°C for 30  
87 seconds, 72°C for 3 minutes; 5 cycles: 94°C for 30 seconds, 70°C for 30 seconds, 72°C for 3  
88 minutes; 20 cycles: 94°C for 30 seconds, 68°C for 30 seconds, 72°C for 3 minutes. Primers  
89 used for 5'- RACE of MSBI1.176 were: MSBI1.176 R813 5'-GCA TCT TTG AGG GCT  
90 TGA TAT GCC GT-3', MSBI1.176 R1258 5'-TCC TGT AAT CAC TCG CCC TTT TTT  
91 GTG T-3' and MSBI1.176 R1383 5'-GCG TTT TCA GGC TGT TTT ACA ATG TTG-3'.  
92 Nested 5'-RACE of CMI1.252 were performed using the following primers: CMI1.252 R724  
93 5'- GCA TGA ACT GTT AAG GGG TCA TTG GC-3', CMI1.252 R920 5'- CAG GGG  
94 CAA AAA TAA TTT CAA CGG TTG-3', CMI1.252 R1883 5'- GGG TTC TTC GCT TTG  
95 TCT TCT AAC ATA TTG CT-3' and CMI1.252 R2005 5'- CAG CAG CTT CTT GAT TCT  
96 CCA ACA TAG TCA-3'. Primers used for nested 3'-RACE of MSBI1.176 were: MSBI1.176  
97 F788 5'-ACG GCA TAT CAA GCC CTC AAA GAT GC-3', MSBI1.176 F944 5'-GCC CCT

98 GCG GTT GTT CCT CTG ATT ACA-3', MSBI1.176 F1655 5'-ACC CCT CAA CCC CAA  
99 AAG CAA AAA CA-3' and MSBI1.176 F155 5'-TGC TTT TGC TTG TTT TCG GGT CTT  
100 AGG GG-3'. Nested 3'-RACE of CMI1.252 were performed using the following primers:  
101 CMI1.252 F695 5'- GCC AAT GAC CCC TTA ACA GTT CAT GCA AGT-3', CMI1.252  
102 F894 5'- CAA CCG TTG AAA TTA TTT TTG CCC CTG-3', CMI1.252 F1852 5'- AGC  
103 AAT ATG TTA GAA GAC AAA GCG AAG AAC CC-3' and CMI1.252 F1976 5'- TGA  
104 CTA TGT TGG AGA ATC AAG AAG CTG CTG-3'. For pRACE cloning all primers were  
105 equipped with the sequence 5'-GAT TAC GCC AAG CTT-3' at their 5'-end. The PCR  
106 program was as following: 5 cycles: 94°C for 30 seconds, 72°C for 3 minutes; 5 cycles: 94°C  
107 for 30 seconds, 70°C for 30 seconds, 72°C for 3 minutes; 25 cycles: 94°C for 30 seconds,  
108 68°C for 30 seconds, 72°C for 3 minutes. Resulting RACE fragments were separated by  
109 agarose gel electrophoresis, eluted using the NucleoSpin gel cleanup kit (Machery & Nagel),  
110 subcloned into the pRACE vector (Clontech) as recommended by the manufacturer's and  
111 identified by conventional Sanger sequencing. For MSBI1.176 a total of 497 clones were  
112 sequenced (primer R813: 128 clones, primer R1258: 108 clones, primer R1383: 167 clones,  
113 primer F944: 94 clones). For CMI1.252 a total of 384 clones were sequenced (primer R724:  
114 96 clones, primer R1883: 108 clones, primer F894: 120 clones, primer F1976: 60 clones).  
115 RACE reactions using cDNAs generated from DNaseI-treated total RNA of mock transfected  
116 HEK293TT cells were used as negative controls. To exclude PCR artifacts, an additional  
117 control was included, in which 1 ng of linearized BMMF DNA was used as a template for  
118 RACE reactions.

119

#### 120 *Synthesis of northern blot probes*

121 Strand-specific RNA probes for northern blot analyses were generated by *in vitro*  
122 transcription of double stranded DNA templates containing a T7 promoter using the

123 TranscriptAid T7 High Yield Transcription Kit (Thermo Scientific) in the presence of 1 mM  
124 Digoxigenin-11-UTP (Roche) as recommended by the manufacturer. Probe integrity was  
125 assessed by Bioanalyzer technology (Applied Biosystems).

126

127 *Northern blot analyses.*

128 For northern blot analyses 5µg of total cellular RNA were denatured for 5 minutes at 68°C in  
129 the presence of 25% Formamide, 1.8M Formaldehyde and 10 mg/ml Ficoll in MOPS buffer  
130 (20mM 3-Morpholinopropane-1-sulfonic acid, 5mM NaOAc, 1mM Ethylenediaminetetra-acetic  
131 acid disodium salt, pH 7.0) and subsequently loaded on a 1% denaturing Formaldehyde  
132 agarose gel containing 1.8M Formaldehyde in MOPS buffer. Electrophoresis was performed  
133 for 2.5 hours at 80V using MOPS buffer containing 80mM Formaldehyde as running buffer.  
134 RiboRuler High Range RNA Ladder (Fermentas) was used as a size marker, which was  
135 visualized by Ethidium Bromide staining prior to blotting. After electrophoresis the gel was  
136 washed in 10xSaline Sodium Citrate (SSC) buffer (Fisher Bioreagents) and diffusion-  
137 transferred to a Hybond N+ Nylon membrane (Amersham) for 16 hours. After transfer the  
138 membrane was washed twice with 2xSSC buffer, before the nucleic acids were crosslinked to  
139 the membrane by UV exposure (Stratalinker 1800, 120.000µJ). The membrane was pre-  
140 hybridized in ULTRAhyb® buffer (Ambion) at 42°C for 6 hours and subsequently hybridized  
141 with 100ng/ml Digoxigenin-labeled RNA probe in ULTRAhyb® buffer at 42°C for 16 hours.  
142 After hybridization the membrane was washed twice for 5 minutes with 2xSSC containing  
143 0.1% SDS and once for 15 minutes with 0.1xSSC containing 0.1% SDS at 42°C. The  
144 membrane was incubated in washing buffer (0.1M Maleic acid, 150mM NaCl, 0.3% Tween  
145 20, pH 7.5) for 2 minutes and subsequently blocked with blocking buffer (1% skim milk in  
146 0.1M Maleic acid, 150mM NaCl, pH 7.5) for 45 minutes before incubating with anti-  
147 Digoxigenin-AP Fab fragments (Roche) at a dilution of 1:10.000 in blocking buffer for 1

148 hour. Then the membrane was washed twice for 15 minutes with washing buffer and  
149 equilibrated for 3 minutes with equilibration buffer (0.1M Tris-HCl, 100 mMNaCl, pH 9.5).  
150 For development the membrane was incubated with CPD-Star reagent (Applied Biosystems)  
151 for 5 minutes, before signals were detected on a BioRad WesternBlot detection system.

152

### 153 *Protein purification for ELISAs.*

154 Chemically competent *E. coli* (SoluBI21, Genlantis) were transformed with a MSBI1.176 Rep  
155 expression plasmid (pEXP5-CT, Invitrogen) followed by clonal selection of high level protein  
156 expression colonies on LB-agar plates containing Ampicillin. The colony was then used to  
157 inoculate 1000 ml LB medium containing Ampicillin and grown until an OD600 of 0.5 was  
158 reached. Protein expression was induced by IPTG (0.66mM) over night at 25°C on a shaking  
159 device, before cells were centrifuged at 6.000xg and 4°C, washed with PBS and re-dissolved  
160 by sonication in 20 packed cell volumes of sample buffer (100mM NaH<sub>2</sub>PO<sub>4</sub>, 10mM Tris-  
161 HCl, 5 mM Imidazole, 5mM beta-Mercaptoethanol, pH 8.0) containing 8M Urea. The protein  
162 was subsequently purified at denaturing conditions (55mM Imidazole for washing and  
163 300mM Imidazole for protein elution) via a C-terminal His<sub>6</sub>-tag by affinity chromatography  
164 (Clontech His60 Ni Superflow resin). The protein purification was followed by Coomassie  
165 protein staining and Rep protein purity was calculated densitometrically.

166

### 167 *Production of mouse monoclonal anti-Rep antibodies.*

168 Mouse monoclonal antibodies were produced by individual immunizations of mice (DKFZ, in  
169 house) with two different KLH-coupled synthetic peptides (peptide 1:  
170 CEARETGKGINANDPLTVH; peptide 2: CKQINEHTDITASYEQHKKGRT, PSL GmbH,  
171 Heidelberg) or with purified, full length MSBI1 Rep protein obtained by denaturing His-tag  
172 affinity purification out of *E. coli*. Rep-specificity of the double sub-cloned hybridomas was

173 verified by western blotting, immunofluorescence microscopy, immunoprecipitation and  
174 ELISA experiments based on detection of Rep fusion proteins with NanoLuc (Promega),  
175 ZsGreen1CI (Clontech) or 3xFlag (Sigma Aldrich) fusion tags as expression controls.

176

177 *Neutralization ELISAs.*

178 ELISA neutralization assays were performed as triplicate experiment to verify the binding  
179 specificity of human plasma antibodies for the Rep antigens analysed in standard ELISA  
180 serological experiments (duplicates within each experiment). The experimental setup included  
181 all the experimental steps previously described for the standard ELISA assay, but, in addition,  
182 included an incubation step (1 h at 37 °C) with a dilution series of a pool of 10 individual,  
183 affinity purified Rep-reactive mouse monoclonal antibodies (1:25-1:1600 in superbloc assay  
184 buffer) after antigen coating and blocking. After binding of mouse anti-Rep antibodies and  
185 washing, plasma incubations as well as serological read out with anti-Human IgG HRP-  
186 coupled secondary antibodies was performed as described previously. Specific binding of  
187 anti-Rep mouse antibodies was monitored by parallel experiments confirming Rep antigen  
188 binding with a mouse-specific detection antibody (also from Dianova, MinX).

189

## 190 **Supplemental figure legends**

191 *Figure S1.*

192 (A) RT-qPCR assessment of +RT/-RT controls of CMI1.252, CMI3.168, MSBI1.176 and  
193 MSBI2.176 in HEK293TT cells. Circular CMI1.252, CMI3.168, MSBI1.176 and MSBI2.176  
194 was transfected into HEK293TT cells, total RNA was isolated 72 hours post transfection and  
195 subjected to reverse transcription using random hexamer primers (+RT) followed by qPCR  
196 quantification of the resulting cDNA using isolate-specific (left) and beta actin (right)  
197 primers. Reverse transcription reactions lacking the reverse transcriptase enzyme were used as



198 a negative control (-RT) in order to access the ratio of RNA-derived cDNA to residual input  
199 DNA in biological triplicates. Absolute quantifications were performed using a standard curve  
200 for each isolate. Signals of the +RT reactions were normalized to 100% for each isolate.

201 (B) RT-qPCR results from BMMF-transfected HEK293TT cells, non-transfected cells as well  
202 as water controls using each BMMF-specific primer set as indicated. qPCR results were  
203 normalized to beta actin as a housekeeping gene, amounts are displayed as -fold beta actin.

204 (C) Putative splicing events for the isolates CMI1.252, CMI3.168 and MSBI1.176 as detected  
205 by RNA-Seq. RNA-Seq reads of HEK293TT cells transfected with each isolate were analyzed  
206 for splicing events using the STAR mapping algorithm [35]. For each splicing event detected  
207 in at least two biological replicates, the intron start site, the intron end, the strand on which the  
208 splicing occurs as well as the maximum observed number of uniquely mapping reads are  
209 indicated.

210

211 *Figure S2.*

212 (A) MSBI1.176 replication positive control: HEK293TT cells were transfected with an  
213 MSBI1.176 genome containing the SV40 origin of replication. Absolute amounts of DpnI-  
214 sensitive (black) and DpnI-resistant (replicated, grey) DNA at days 6, 10 and 13 post  
215 transfection were quantified by qPCR.

216 (B) Assessment of DpnI digestion efficacy: 100 ng of MSBI1.176 or CMI1.252 were digested  
217 with DpnI enzyme as indicated in the materials and methods section of our manuscript either  
218 solely in water or in the presence of 10 $\mu$ g of total genomic DNA from HEK293TT cells.  
219 Reactions lacking DpnI enzyme served as controls. Relative amounts of MSBI1.176 or  
220 CMI1.252 were quantified by qPCR using DpnI-sensitive primers.

221

222 *Figure S3.*

223 (A) ClustAl W dendogram showing the similarity of the BMMFs MSBI1.176, MSBI2.176,  
224 CMI1.252, CMI3.168 and their closest related *Acinetobacter baumannii* plasmid pAB120  
225 [80]. The relative distances are indicated.

226 (B) Clustering of the A/T-rich region as well as the iteron-like repeats of the BMMFs  
227 MSBI1.176, MSBI2.176, CMI1.252, CMI3.168 and the *Acinetobacter baumannii* plasmid  
228 pAB120. The location of the iteron-like repeats is indicated. Nucleotide numbers correspond  
229 to the corresponding full length genomes. The color code used is based on the nucleotides, the  
230 conservation as well as the consensus sequence is given below the alignment.

231

232 *Figure S4.*

233 Comparison of putative promoter elements located within the 250 bp upstream of the major  
234 transcription start site of the Rep ORF in MSBI1.176 (upper sequence) and CMI1.252 (lower  
235 sequence). The transcription start site is indicated as an arrow. The corresponding TATA box  
236 sequence is highlighted in grey and corresponds to a tolerated variant of the TATA box  
237 identified for a large set of ribosomal protein genes [48]. Transcription factor binding sites  
238 have been identified using the Alibaba2 algorithm [47]. Transcription factor binding sites,  
239 which are in common for MSBI1.176 and CMI1.252 are highlighted in red.

240

241 *Table S1.*

242 List of genes significantly ( $p < 0.01$ ) differentially expressed upon MSBI1.176 expression in  
243 HEK293TT cells. The log(2)-fold change and the p-values are indicated.

244

245 *Table S2.*

246 List of genes significantly ( $p < 0.01$ ) differentially expressed upon CMI1.252 expression in

247 HEK293TT cells. The log(2)-fold change and the p-values are indicated.

248

Figure S1

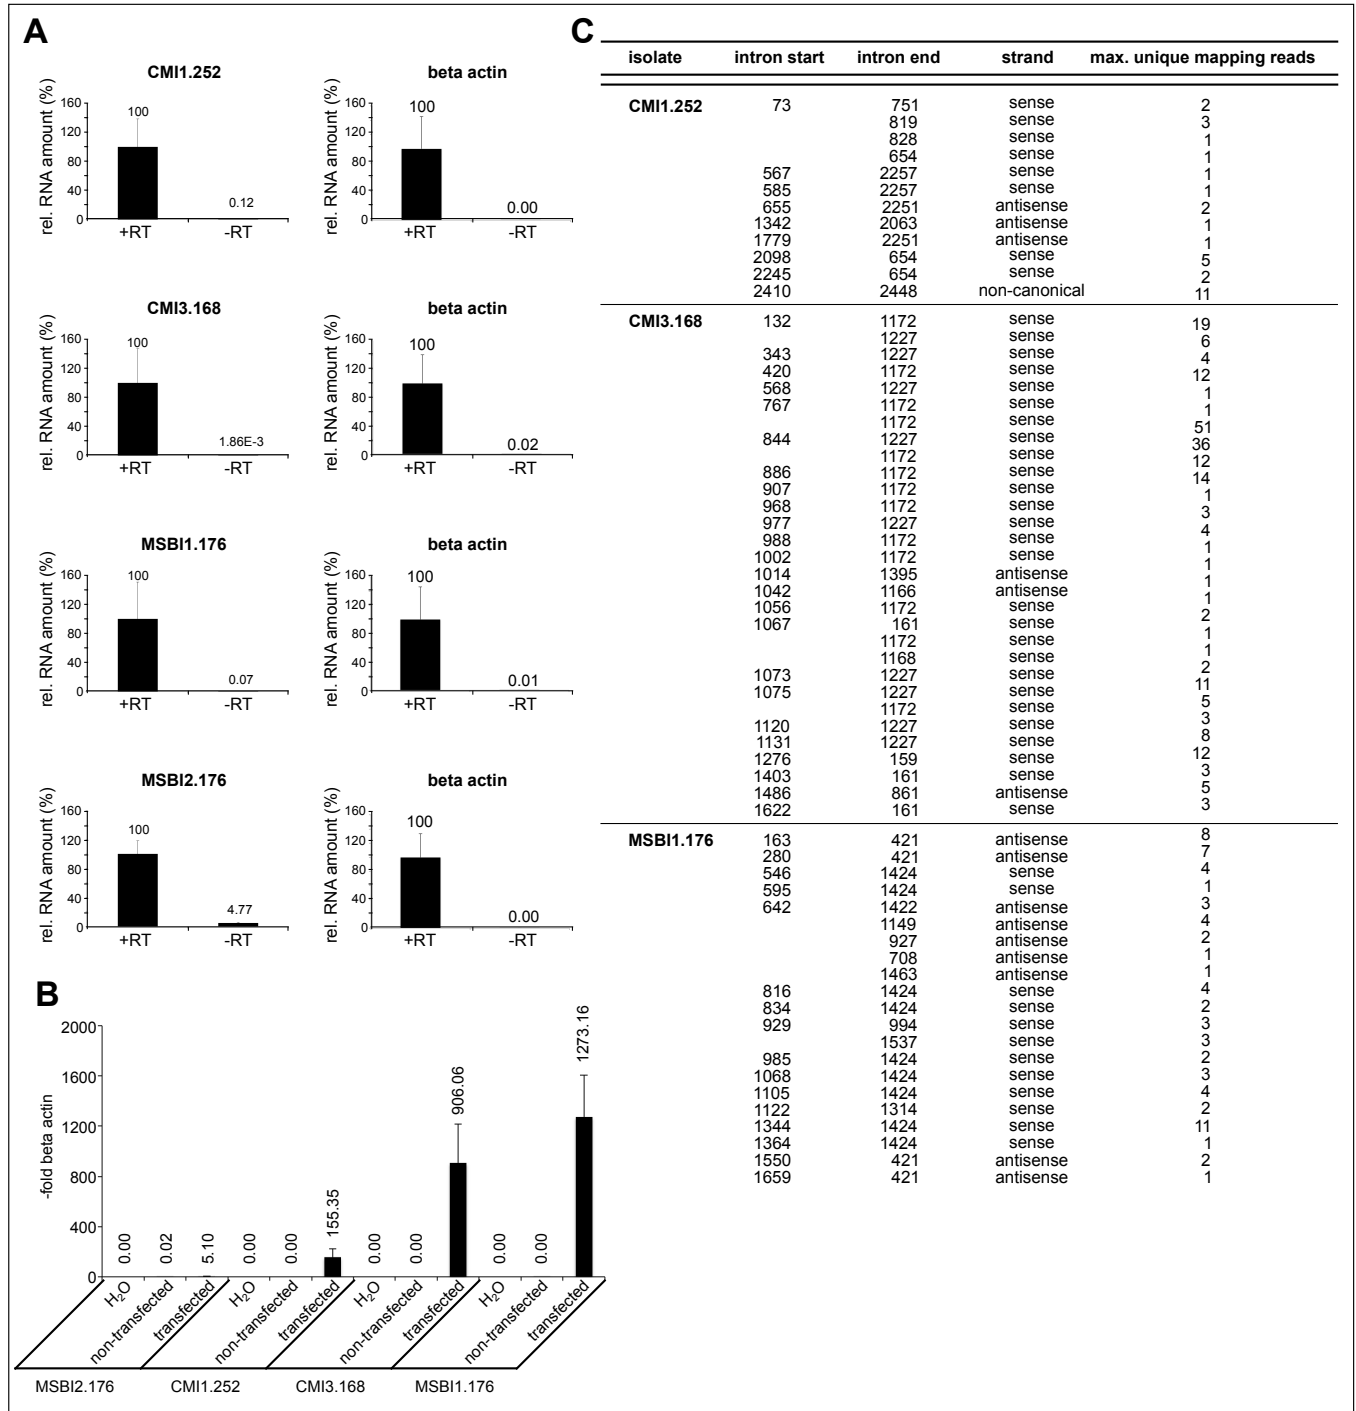

Figure S2

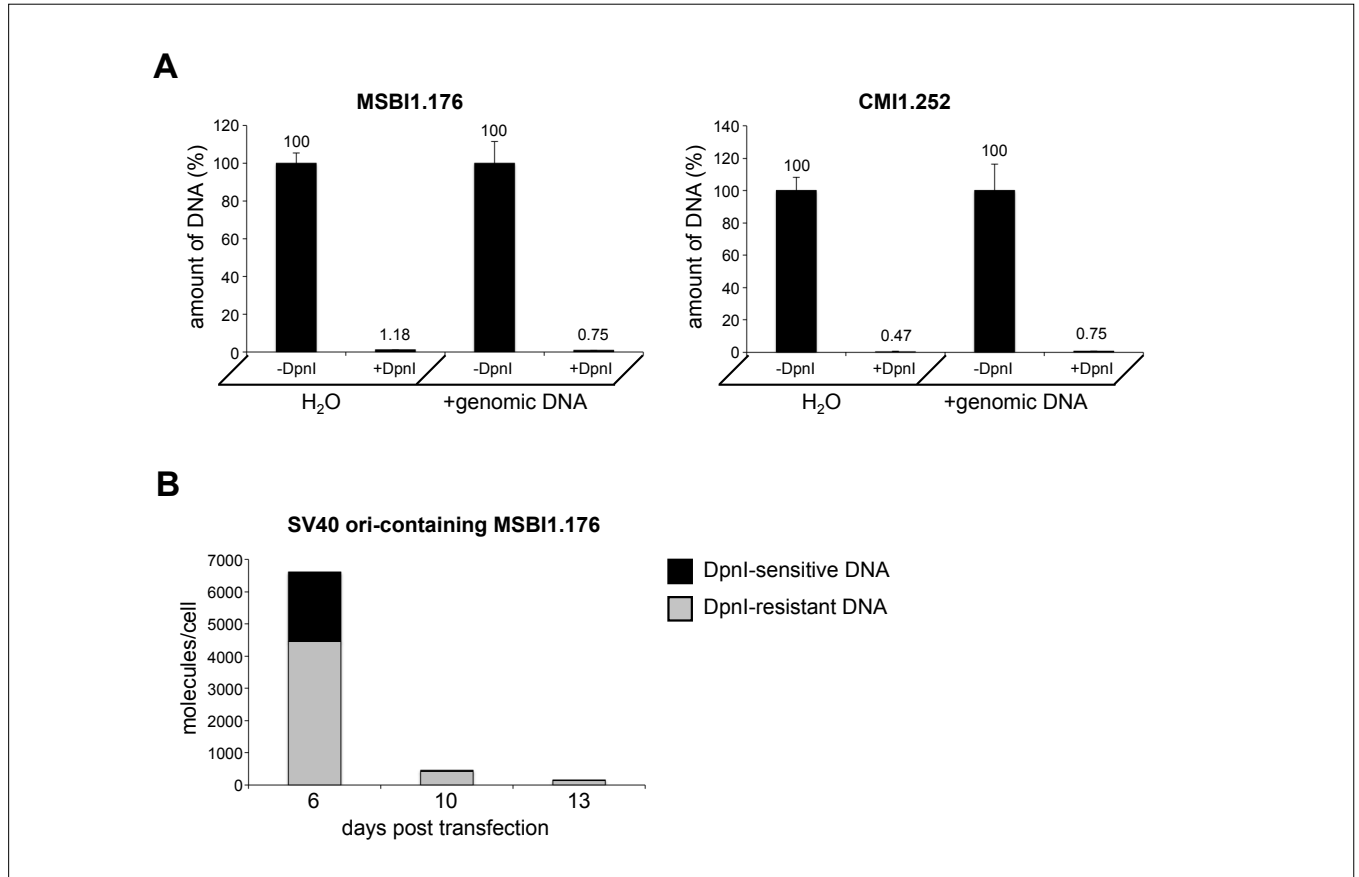

Figure S3

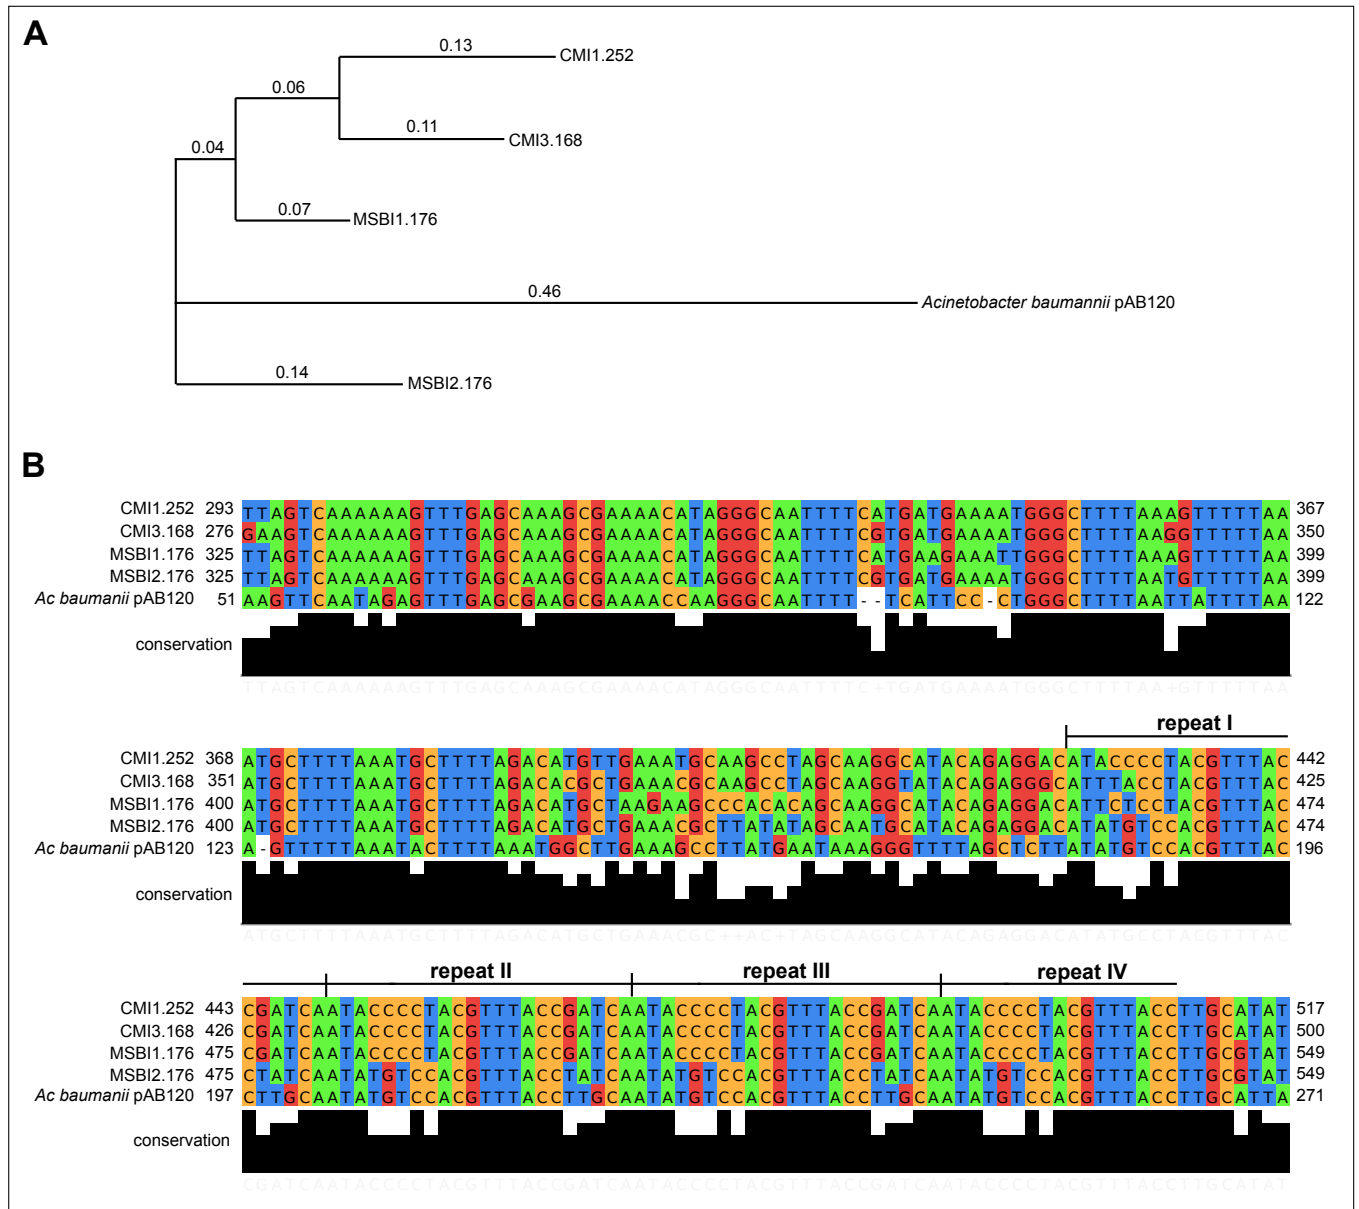

Figure S4

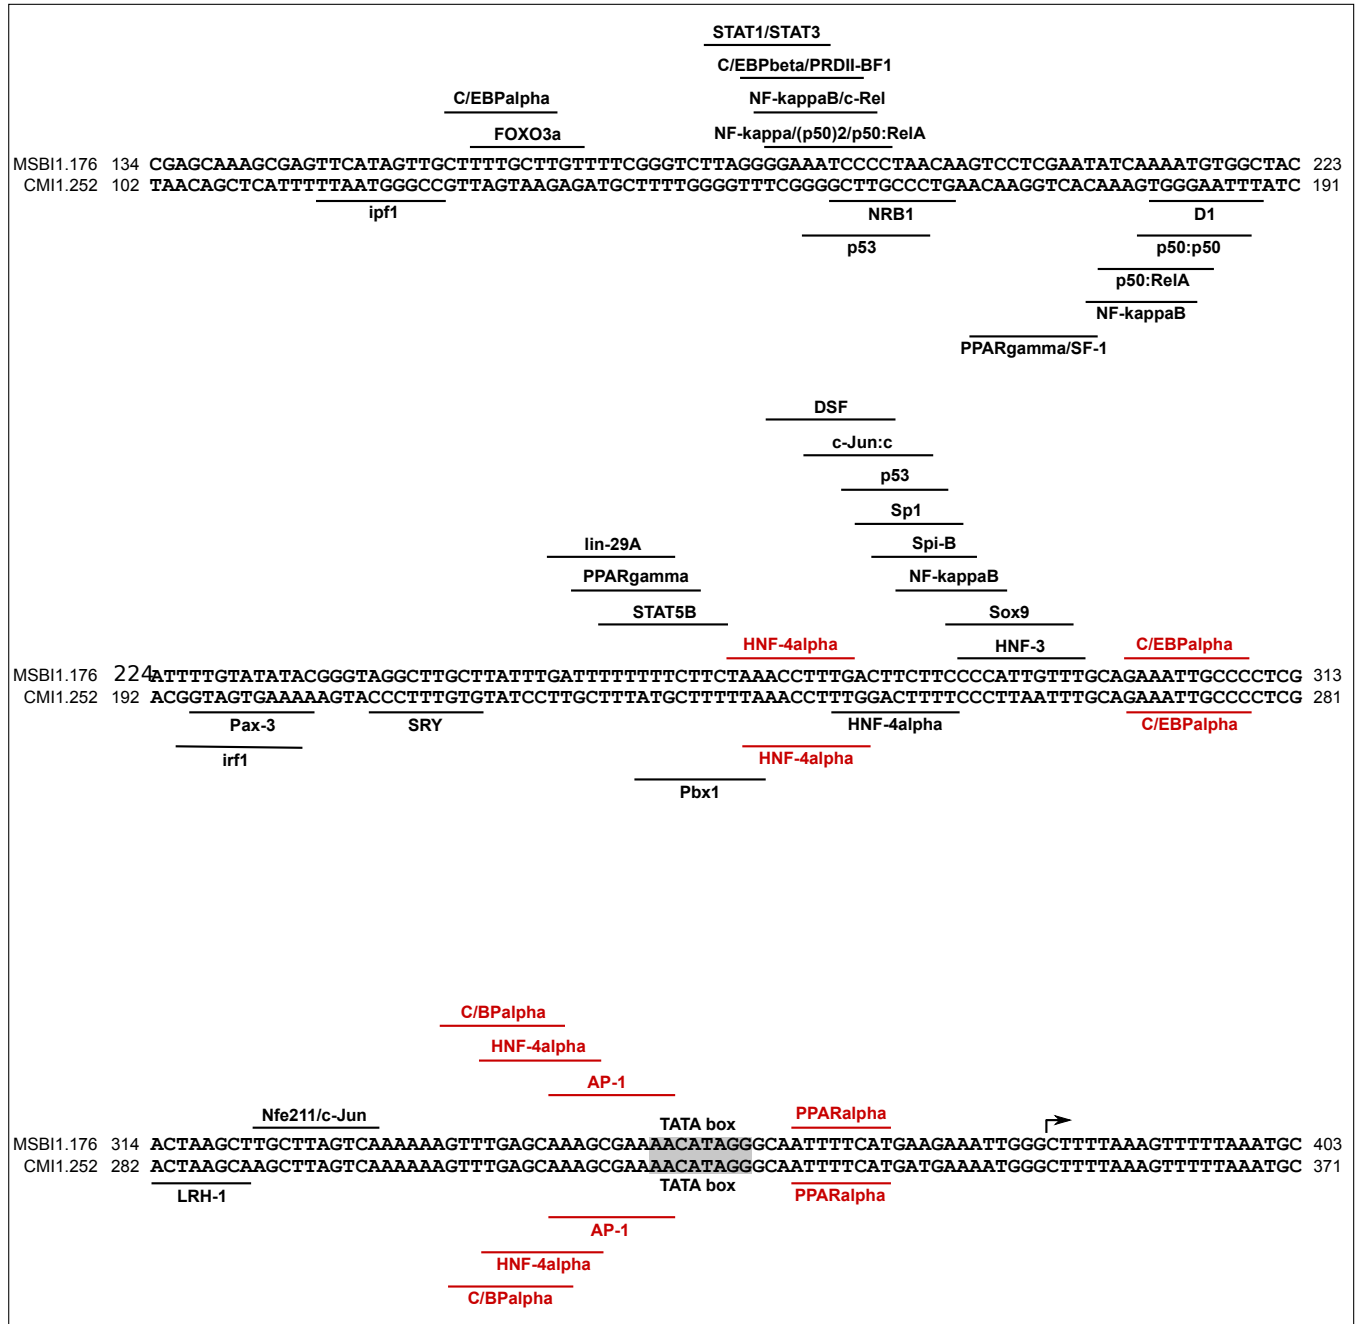

table S1

| gene         | log(2)-fold change | P-Value  |
|--------------|--------------------|----------|
| FABP7        | 6.46               | 0.000402 |
| NEUROD6      | 5.95               | 0.001435 |
| TM4SF1       | 5.60               | 0.00309  |
| FEZF2        | 5.42               | 0.004375 |
| FABP4        | 5.24               | 0.002747 |
| LINC01094    | 5.10               | 0.001001 |
| LINC01204    | 4.95               | 0.004752 |
| TNFSF11      | 4.92               | 0.00354  |
| DEFB109P1    | 4.89               | 0.004337 |
| MIR4672      | 4.64               | 0.007961 |
| COL1A2       | 4.20               | 0.001681 |
| SLC25A52     | 3.46               | 0.006348 |
| VHLL         | 3.32               | 0.005596 |
| HCAR3        | 2.78               | 0.007769 |
| SNORD126     | 1.89               | 0.006346 |
| EGR1         | 1.56               | 9.61E-05 |
| SNORA71D     | 1.50               | 0.006002 |
| SNORA74A     | 1.50               | 0.001055 |
| FOS          | 1.45               | 0.001061 |
| FOSB         | 1.39               | 0.004301 |
| ADAMTSL4-AS1 | 1.34               | 0.001448 |
| ADAM32       | 1.21               | 0.008342 |
| C10orf32     | 1.15               | 0.007084 |
| CYR61        | 1.13               | 0.000436 |
| C19orf10     | 1.13               | 0.00886  |
| POLE4        | 1.13               | 0.00306  |
| PRC1-AS1     | 1.12               | 0.003718 |
| U2AF1        | 1.11               | 0.000165 |
| ATAD3B       | 1.10               | 0.008987 |
| PSG4         | 1.10               | 0.001196 |
| NOMO3        | 1.10               | 0.001081 |
| JOSD2        | 1.09               | 0.008611 |
| MRPL12       | 1.09               | 0.003548 |
| RNU4ATAC     | 1.08               | 0.006153 |
| EMC7         | 1.04               | 0.000751 |
| UBE2B        | 1.02               | 0.002207 |
| SNORA71B     | 1.00               | 0.006363 |
| PCBD2        | 1.00               | 0.007732 |
| PIGW         | 0.99               | 0.003734 |
| POP1         | 0.94               | 0.004418 |
| PSMC5        | 0.94               | 0.00093  |
| HMBS         | 0.93               | 0.001528 |
| TXN          | 0.92               | 0.006325 |
| ZNF117       | 0.92               | 0.005095 |
| RRAGC        | 0.89               | 0.008277 |
| STAG1        | 0.88               | 0.002319 |
| MRPL1        | 0.87               | 0.005405 |
| POMP         | 0.86               | 0.007887 |



|          |       |          |
|----------|-------|----------|
| SGCB     | 0.85  | 0.006209 |
| GTF3C6   | 0.85  | 0.003661 |
| HSPE1    | 0.85  | 0.004931 |
| EMILIN2  | 0.83  | 0.005564 |
| TDP2     | 0.82  | 0.002753 |
| BOLA3    | 0.82  | 0.005806 |
| TMED9    | 0.82  | 0.004308 |
| SIRT1    | 0.81  | 0.003086 |
| OTUD1    | 0.81  | 0.006245 |
| RRM2     | 0.79  | 0.003578 |
| BRCC3    | 0.78  | 0.004558 |
| TRMT10A  | 0.76  | 0.008961 |
| KLF6     | 0.76  | 0.006387 |
| NDUFS3   | 0.76  | 0.009084 |
| DSTN     | 0.74  | 0.004321 |
| ZNF480   | 0.74  | 0.009531 |
| CTR9     | 0.74  | 0.003805 |
| RBM3     | 0.74  | 0.00483  |
| PSMA1    | 0.74  | 0.009903 |
| SEPHS2   | 0.73  | 0.003852 |
| ADI1     | 0.71  | 0.00605  |
| HNRNPM   | 0.70  | 0.009805 |
| MRPL15   | 0.65  | 0.008676 |
| E2F2     | -0.71 | 0.006255 |
| TSPYL2   | -0.72 | 0.007667 |
| NIPSNAP1 | -0.76 | 0.009554 |
| TXNIP    | -0.79 | 0.003394 |
| HMGA1    | -0.80 | 0.007529 |
| PCED1A   | -0.80 | 0.005222 |
| ARHGEF6  | -0.85 | 0.007401 |
| AES      | -0.86 | 0.005081 |
| SEC31B   | -0.90 | 0.006365 |
| PLA2G6   | -0.91 | 0.009329 |
| PDK1     | -0.91 | 0.008367 |
| SERINC2  | -0.92 | 0.007766 |
| FSCN1    | -0.93 | 0.005617 |
| KLF7     | -0.93 | 0.009869 |
| CDR1     | -0.95 | 0.009388 |
| PLEKHB1  | -0.95 | 0.009105 |
| METTL7A  | -0.96 | 0.009095 |
| MGC12916 | -0.96 | 0.009909 |
| CACNB1   | -0.96 | 0.00607  |
| PLEKHH2  | -0.98 | 0.001501 |
| CYP26B1  | -0.98 | 0.006242 |
| NOXA1    | -0.98 | 0.004756 |
| CRABP2   | -0.99 | 0.005456 |
| IFI6     | -1.00 | 0.003896 |
| GABBR1   | -1.01 | 0.005817 |
| TRIM46   | -1.01 | 0.003907 |
| PRSS30P  | -1.02 | 0.004606 |

|              |       |          |
|--------------|-------|----------|
| SDC3         | -1.02 | 0.005935 |
| HSPG2        | -1.02 | 0.006004 |
| ZFHX2        | -1.03 | 0.008763 |
| LOC100652736 | -1.04 | 0.007096 |
| FAM131B      | -1.05 | 0.007442 |
| PIM1         | -1.05 | 0.005478 |
| BMF          | -1.06 | 0.003037 |
| TMCO6        | -1.06 | 0.006823 |
| IFITM2       | -1.07 | 0.005081 |
| SYT6         | -1.07 | 0.006889 |
| CAMK1D       | -1.07 | 0.00859  |
| NAV2         | -1.07 | 0.002881 |
| SUSD4        | -1.08 | 0.002035 |
| TMEM255A     | -1.08 | 0.007569 |
| DOC2A        | -1.09 | 0.002639 |
| TP53I11      | -1.10 | 0.003542 |
| C1orf233     | -1.12 | 0.009433 |
| TSPAN18      | -1.12 | 0.005081 |
| SEMA4G       | -1.13 | 0.001413 |
| GAP43        | -1.15 | 0.004709 |
| ATHL1        | -1.15 | 0.000568 |
| LIPE-AS1     | -1.15 | 0.007323 |
| SYT7         | -1.17 | 0.007807 |
| ST3GAL1      | -1.17 | 0.00204  |
| CEACAM1      | -1.17 | 0.0095   |
| PPP1R13L     | -1.18 | 0.001203 |
| ASS1         | -1.18 | 0.002322 |
| PPDPF        | -1.19 | 0.003725 |
| BCL11B       | -1.19 | 0.00411  |
| COL24A1      | -1.20 | 0.003901 |
| CRIP2        | -1.20 | 0.004433 |
| ESRRG        | -1.20 | 0.005133 |
| FOXD2-AS1    | -1.20 | 0.003566 |
| FXYD6        | -1.21 | 0.001208 |
| GSTM4        | -1.21 | 0.008592 |
| SLC16A2      | -1.21 | 0.00096  |
| AHNAK2       | -1.22 | 0.000508 |
| LPCAT4       | -1.22 | 0.00322  |
| NRM          | -1.23 | 0.003113 |
| AMT          | -1.23 | 0.002786 |
| PPM1J        | -1.24 | 0.004247 |
| SHANK2       | -1.24 | 0.005587 |
| LINC00086    | -1.24 | 0.001471 |
| SIX5         | -1.24 | 0.001995 |
| IFITM1       | -1.25 | 0.001415 |
| UNC5A        | -1.25 | 0.009903 |
| CTC-338M12.4 | -1.25 | 0.002209 |
| SLC25A35     | -1.26 | 0.004168 |
| NRBP2        | -1.26 | 0.000325 |
| PKNOX2       | -1.26 | 0.003171 |

|              |       |          |
|--------------|-------|----------|
| BASP1        | -1.27 | 0.001713 |
| HSD17B14     | -1.27 | 0.007576 |
| SLC30A3      | -1.27 | 0.005977 |
| MN1          | -1.27 | 0.001911 |
| TUBB4A       | -1.28 | 0.003399 |
| LOC100506142 | -1.29 | 0.001796 |
| DLX4         | -1.30 | 0.002639 |
| GYPC         | -1.30 | 0.001831 |
| PLLP         | -1.31 | 0.003795 |
| LOC646903    | -1.31 | 0.006679 |
| KCNN3        | -1.32 | 0.002974 |
| BAI1         | -1.32 | 0.00135  |
| SEMA4A       | -1.32 | 0.009668 |
| LINC00910    | -1.33 | 0.004931 |
| SPDYE3       | -1.33 | 0.007722 |
| USH1C        | -1.33 | 0.005961 |
| EFNB3        | -1.35 | 0.000581 |
| SLIT3        | -1.36 | 0.005448 |
| HLA-DOB      | -1.36 | 0.001805 |
| C1orf213     | -1.37 | 0.001005 |
| HOXC-AS1     | -1.37 | 0.003294 |
| FAM84B       | -1.39 | 0.00103  |
| CRIP3        | -1.40 | 0.008311 |
| GMDS-AS1     | -1.41 | 0.003528 |
| DENND6B      | -1.42 | 0.000483 |
| NLGN2        | -1.43 | 0.000121 |
| PADI2        | -1.44 | 0.00279  |
| PLEKHA6      | -1.47 | 0.003535 |
| TMEM171      | -1.50 | 0.007248 |
| NXPH4        | -1.50 | 0.000809 |
| PPFIA4       | -1.50 | 0.000535 |
| MIR3609      | -1.51 | 0.00689  |
| MAPK15       | -1.52 | 0.000146 |
| GLI1         | -1.54 | 0.001049 |
| PHKA2-AS1    | -1.54 | 0.004936 |
| LOC100272217 | -1.55 | 0.006098 |
| HLA-DMA      | -1.56 | 0.002177 |
| MRPL23-AS1   | -1.56 | 0.004726 |
| ADRB2        | -1.57 | 0.005967 |
| SLC7A3       | -1.57 | 0.000437 |
| SPDYC        | -1.57 | 0.000936 |
| IGSF21       | -1.57 | 0.004581 |
| DDIT4        | -1.58 | 0.000306 |
| CTAGE7P      | -1.58 | 0.000202 |
| CRHR1        | -1.68 | 0.001519 |
| HES7         | -1.69 | 0.003344 |
| SLC22A31     | -1.70 | 0.000621 |
| SSPO         | -1.73 | 0.001991 |
| MFI2-AS1     | -1.77 | 0.001566 |
| EDA2R        | -1.80 | 0.005739 |

|              |       |          |
|--------------|-------|----------|
| LOC101928689 | -1.80 | 2.71E-05 |
| IGFBP6       | -1.84 | 0.008811 |
| C19orf66     | -1.87 | 0.009129 |
| PCOLCE-AS1   | -1.89 | 0.003421 |
| ARHGAP23     | -1.92 | 0.001525 |
| MLC1         | -1.92 | 0.002299 |
| ENDOU        | -1.94 | 0.004885 |
| SOSTDC1      | -1.95 | 0.008596 |
| ZBTB32       | -1.95 | 0.000908 |
| PRRT2        | -1.96 | 1.35E-05 |
| MPZ          | -1.98 | 0.001163 |
| C16orf11     | -1.98 | 0.009079 |
| PTGES        | -1.98 | 0.000493 |
| C1orf95      | -1.98 | 8.22E-05 |
| LOC113230    | -1.99 | 0.001844 |
| KCNQ4        | -2.00 | 0.003894 |
| PRKCG        | -2.01 | 0.000885 |
| PACSIN1      | -2.03 | 0.009528 |
| LIF          | -2.07 | 0.006503 |
| LINC00896    | -2.16 | 0.003691 |
| H19          | -2.20 | 0.007163 |
| KRT75        | -2.23 | 0.001872 |
| IGFBP5       | -2.25 | 6.13E-05 |
| P2RY4        | -2.27 | 0.006515 |
| CACNG6       | -2.27 | 0.001229 |
| LINC00173    | -2.35 | 0.000667 |
| ASB11        | -2.36 | 0.007159 |
| DKFZP434H168 | -2.43 | 0.006553 |
| CACNA1I      | -2.59 | 0.005098 |
| IL12A-AS1    | -2.61 | 0.008842 |
| NUPR1        | -2.62 | 0.00081  |
| PNCK         | -2.64 | 0.00125  |
| GPR112       | -2.66 | 0.007563 |
| SYNDIG1L     | -2.68 | 0.009232 |
| LGI3         | -2.75 | 0.004521 |
| RHOXF1       | -2.97 | 0.006693 |
| CIART        | -2.99 | 0.001059 |
| RNF113B      | -3.12 | 0.001587 |
| SDR16C5      | -3.21 | 0.009068 |
| LRRC37A11P   | -3.28 | 0.007061 |
| TRH          | -3.35 | 0.002194 |
| PCAT6        | -3.35 | 0.00064  |
| FAS-AS1      | -3.40 | 0.000191 |
| KLK10        | -3.63 | 0.000895 |
| AC011738.4   | -3.71 | 0.008404 |
| MIR301B      | -4.04 | 0.004559 |
| LOC101928158 | -4.08 | 0.003146 |
| UPK2         | -4.25 | 0.004323 |
| MSLN         | -4.36 | 0.003994 |
| MIR196A2     | -4.55 | 0.005243 |

|               |       |          |
|---------------|-------|----------|
| EDN2          | -4.69 | 0.009738 |
| A4GNT         | -4.79 | 0.007393 |
| LINC00633     | -4.90 | 0.004418 |
| MIR4634       | -4.93 | 0.004036 |
| RP5-1029K10.2 | -4.93 | 0.004671 |
| REN           | -4.99 | 0.005668 |
| CRYAA         | -5.08 | 0.008273 |
| MIR4768       | -5.11 | 0.005682 |
| MIR6774       | -5.16 | 0.003855 |
| GADL1         | -5.17 | 0.005322 |
| CTAGE9        | -5.23 | 0.003032 |
| LOC101928767  | -5.24 | 0.005086 |
| MIR6870       | -5.38 | 0.005011 |
| LINC00943     | -5.39 | 0.003841 |
| LOC643355     | -5.55 | 0.000759 |
| DDX11L10      | -5.91 | 0.000853 |

table S2

| gene        | log(2)-fold change | P-Value   |
|-------------|--------------------|-----------|
| LINC00575   | 4.83               | 0.0065572 |
| SPANXA2-OT1 | 4.73               | 0.0072595 |
| NCR3        | 4.65               | 0.0083563 |
| KLRC4       | 4.15               | 0.0037143 |
| MIR578      | 3.96               | 0.0074699 |
| LPP-AS1     | 2.76               | 0.0039224 |
| SNORD97     | 1.66               | 0.0044813 |
| FOS         | 1.58               | 0.0011066 |
| SNORA74A    | 1.41               | 0.000637  |
| EGR1        | 1.37               | 0.0015771 |
| SNORD45B    | 1.21               | 0.0033671 |
| U2AF1       | 1.19               | 6.74E-05  |
| EIF1AX-AS1  | 1.17               | 0.008158  |
| C10orf32    | 1.16               | 0.0066349 |
| HSPE1       | 1.15               | 0.0001766 |
| MRPL12      | 1.13               | 0.0051451 |
| PFDN4       | 1.02               | 0.0049079 |
| PSG4        | 1.02               | 0.002726  |
| HIST1H1D    | 1.02               | 0.0052125 |
| TXN         | 1.02               | 0.0027833 |
| HIST1H2AB   | 1.00               | 0.004968  |
| SNRPE       | 0.98               | 0.0060926 |
| POP1        | 0.95               | 0.0044858 |
| TMEM126A    | 0.95               | 0.0085596 |
| MRPL1       | 0.94               | 0.0048162 |
| EMC7        | 0.92               | 0.0069788 |
| UBE2B       | 0.91               | 0.0095151 |
| GTF3C6      | 0.84               | 0.0040184 |
| ZCCHC12     | 0.83               | 0.0085864 |
| BOLA3       | 0.80               | 0.0073795 |
| VBP1        | 0.79               | 0.0087598 |
| HPRT1       | 0.79               | 0.0048921 |
| DSTN        | 0.78               | 0.0028448 |
| PSMC6       | 0.78               | 0.0068835 |
| PSMC5       | 0.77               | 0.0080373 |
| PSMA1       | 0.73               | 0.0083819 |
| RBM3        | 0.73               | 0.0033141 |
| RRM2        | 0.72               | 0.0082446 |
| CCDC47      | 0.72               | 0.0064913 |
| SIRT1       | 0.70               | 0.0080023 |
| CENPH       | 0.70               | 0.007959  |
| COPS2       | 0.68               | 0.0048559 |
| MMADHC      | 0.66               | 0.0096815 |
| IQGAP3      | -0.65              | 0.0055072 |
| PVRL2       | -0.71              | 0.0079343 |
| PAN2        | -0.72              | 0.0051851 |
| SREBF2      | -0.80              | 0.0043767 |
| LENG8       | -0.81              | 0.0035866 |

|              |       |           |
|--------------|-------|-----------|
| PCED1A       | -0.81 | 0.0039934 |
| TXNIP        | -0.81 | 0.0039243 |
| ERF          | -0.83 | 0.0081612 |
| E2F2         | -0.83 | 0.0024121 |
| AES          | -0.83 | 0.0050496 |
| TBKBP1       | -0.83 | 0.0088437 |
| RNF44        | -0.88 | 0.0081893 |
| FTL          | -0.91 | 0.0094281 |
| RHBDD2       | -0.93 | 0.0016784 |
| PRR12        | -0.94 | 0.0092897 |
| LMOD1        | -0.94 | 0.0059122 |
| TMEM79       | -0.94 | 0.0069906 |
| HCN3         | -0.97 | 0.004871  |
| TMEM198B     | -0.98 | 0.0073583 |
| PLA2G6       | -0.98 | 0.0040264 |
| SEMA4G       | -0.99 | 0.0043221 |
| SLC22A17     | -0.99 | 0.0075784 |
| TPT1-AS1     | -0.99 | 0.0080775 |
| GABBR1       | -1.00 | 0.0039269 |
| EFNB3        | -1.00 | 0.0061089 |
| GRIP2        | -1.00 | 0.0061548 |
| CACNB1       | -1.01 | 0.0041981 |
| SEC31B       | -1.02 | 0.0050225 |
| SERINC2      | -1.02 | 0.0035103 |
| SLC25A35     | -1.03 | 0.0075506 |
| SLC16A2      | -1.03 | 0.0041286 |
| SUSD4        | -1.03 | 0.005332  |
| TMEM8B       | -1.03 | 0.0074665 |
| INO80E       | -1.04 | 0.0067985 |
| GRINA        | -1.05 | 0.0035849 |
| DENND6B      | -1.06 | 0.0068051 |
| CDR1         | -1.07 | 0.0054565 |
| MYADM        | -1.08 | 0.0042851 |
| DGCR11       | -1.08 | 0.0061595 |
| DLX4         | -1.08 | 0.0087857 |
| PPDPF        | -1.08 | 0.0092484 |
| CTC-338M12.4 | -1.09 | 0.0095676 |
| WNK4         | -1.12 | 0.0037724 |
| LOC100506142 | -1.12 | 0.0036296 |
| IGFBP5       | -1.13 | 0.004886  |
| SLC7A3       | -1.13 | 0.0055249 |
| COL1A1       | -1.15 | 0.0057876 |
| WASH5P       | -1.16 | 0.0091126 |
| NRBP2        | -1.16 | 0.0023559 |
| NLGN2        | -1.16 | 0.0014477 |
| GLUD1P3      | -1.18 | 0.0072511 |
| LOC100652736 | -1.20 | 0.0019061 |
| TRIM46       | -1.21 | 0.000733  |
| SLC6A9       | -1.21 | 0.007884  |
| CTAGE7P      | -1.24 | 0.0095779 |

|             |       |           |
|-------------|-------|-----------|
| PCBP4       | -1.25 | 0.0002551 |
| BCAN        | -1.26 | 0.0032855 |
| SPDYC       | -1.29 | 0.0035237 |
| TRIM58      | -1.30 | 0.0085151 |
| SLC30A3     | -1.30 | 0.0033087 |
| LINC00877   | -1.31 | 0.0072858 |
| NR1D1       | -1.31 | 0.0014958 |
| KRTAP19-1   | -1.33 | 0.0052631 |
| PLEKHA6     | -1.33 | 0.0076762 |
| ASIC3       | -1.34 | 0.0017028 |
| WNT8B       | -1.34 | 0.0065969 |
| L1CAM       | -1.35 | 0.0043219 |
| SLC22A31    | -1.36 | 0.0051794 |
| CYP2E1      | -1.37 | 0.0004016 |
| MAPK15      | -1.41 | 0.0005429 |
| RFPL4A      | -1.45 | 0.0040522 |
| NTRK3       | -1.46 | 0.0084716 |
| RAPGEF3     | -1.48 | 0.0089316 |
| SNORD88B    | -1.52 | 0.0009048 |
| TMEM151A    | -1.54 | 0.0097119 |
| GLI1        | -1.55 | 0.0004804 |
| CCDC147-AS1 | -1.55 | 0.006987  |
| IL17RE      | -1.58 | 0.0077628 |
| ZBTB32      | -1.59 | 0.0050863 |
| KCNK9       | -1.60 | 0.0082419 |
| SSPO        | -1.62 | 0.0035774 |
| ENDOU       | -1.72 | 0.0056333 |
| TCERG1L     | -1.73 | 0.0048335 |
| ITGAL       | -1.73 | 0.0066669 |
| ZMAT1       | -1.74 | 0.0089053 |
| PRPH        | -1.75 | 0.0084262 |
| ATP6V1G2    | -1.83 | 0.0008974 |
| PRRT2       | -1.85 | 0.000829  |
| LIF         | -1.88 | 0.0040283 |
| BCYRN1      | -1.89 | 0.0031251 |
| SPG20OS     | -1.97 | 0.0015627 |
| GREM2       | -1.99 | 0.0080243 |
| MIR3609     | -2.00 | 2.21E-05  |
| ALOXE3      | -2.02 | 0.0005102 |
| SHISA7      | -2.04 | 0.0016433 |
| CIART       | -2.07 | 0.0048897 |
| NELL1       | -2.09 | 0.0027595 |
| PKD1L2      | -2.16 | 0.0059482 |
| VWA5A       | -2.17 | 0.0025375 |
| AR          | -2.19 | 0.0004853 |
| MPZ         | -2.25 | 0.0012836 |
| TCTE3       | -2.35 | 0.0050986 |
| SLC30A2     | -2.42 | 0.0097051 |
| MATN4       | -2.55 | 0.0050881 |
| CACNA1I     | -2.64 | 0.0062659 |



|              |       |           |
|--------------|-------|-----------|
| RP11-67M1.1  | -2.84 | 0.0045802 |
| MIR3677      | -3.10 | 0.0083205 |
| EDA2R        | -3.11 | 1.96E-05  |
| CNTD2        | -3.13 | 0.0001547 |
| ZSCAN10      | -3.42 | 0.0025556 |
| DCST2        | -3.49 | 5.41E-05  |
| FABP5P3      | -3.66 | 0.0038056 |
| SPRR2F       | -3.76 | 0.0056194 |
| MIR1914      | -3.81 | 0.0069007 |
| LOC101928158 | -3.86 | 0.0052413 |
| GDF15        | -3.87 | 6.45E-06  |
| DCX          | -3.87 | 0.0048471 |
| ARMC12       | -4.76 | 0.0003432 |
| OTOP2        | -4.86 | 0.0062546 |
| MIR7109      | -4.98 | 0.0093277 |
| AC019118.2   | -4.99 | 0.0086605 |
| OPN5         | -5.11 | 0.0050492 |
| TEX36        | -5.15 | 0.0036454 |
| LINC01214    | -5.19 | 0.0085767 |
| LINC00943    | -5.21 | 0.0058894 |
| RBPJL        | -5.23 | 0.0020774 |
| BANK1        | -5.43 | 0.0032171 |
| LOC285768    | -5.46 | 0.0031214 |
| SLC6A3       | -5.55 | 0.00338   |
| SDPR         | -5.62 | 0.0026785 |
| TRIM55       | -5.69 | 0.0016336 |
| TAS2R40      | -5.70 | 0.0016855 |

**Figure 2c, loading control, full blot**

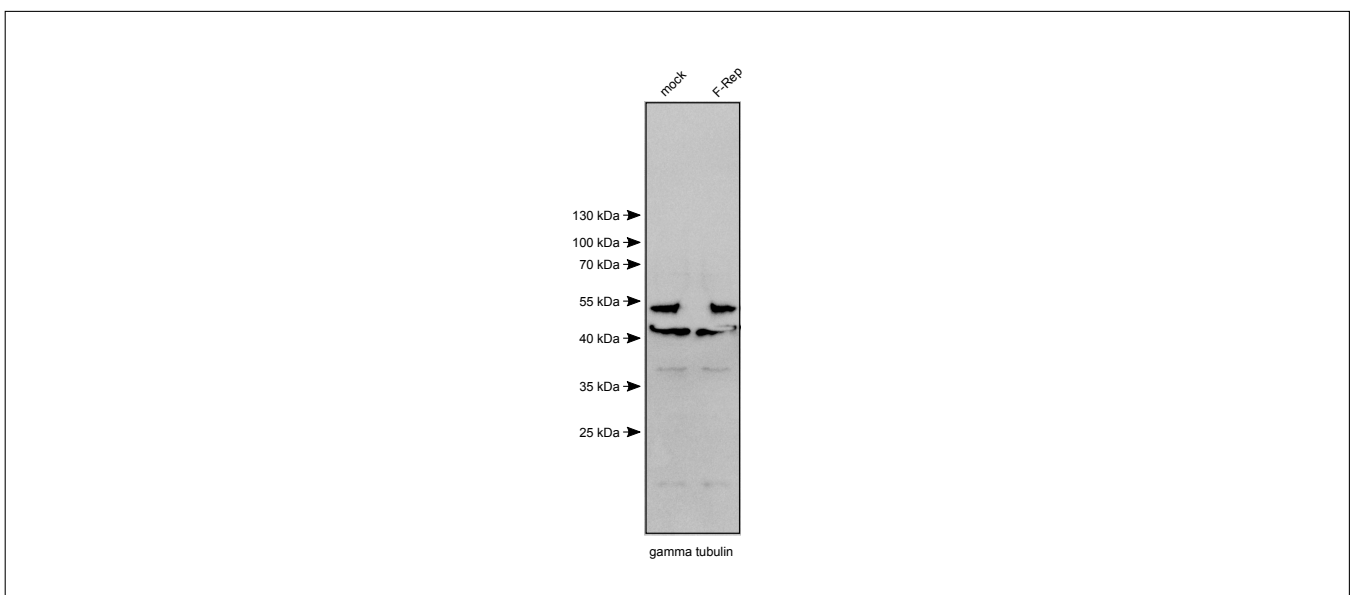

Supplement: 41598_2018_21317_MOESM1_ESM.pdf [file 41598_2018_21317_MOESM1_ESM.pdf]
